# Supplementary material
Source: Springer Nature journal article supplement (https://www.springermedizin.de/resource/supplementary/13024_2012_378_MOESM1_ESM.pdf/9643836)

**A**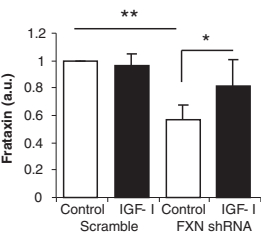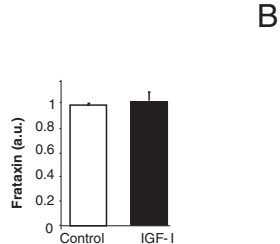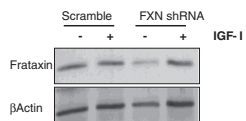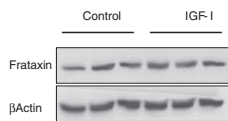**B**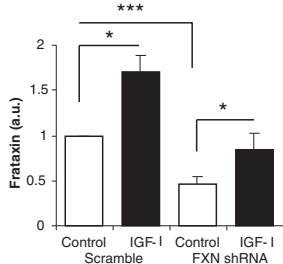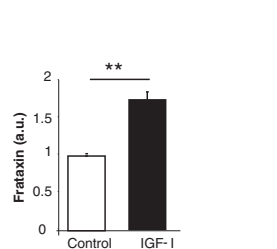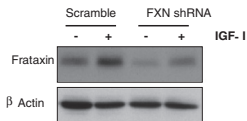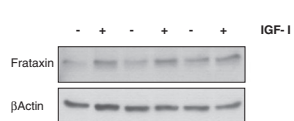**C**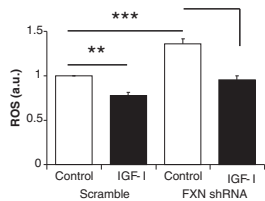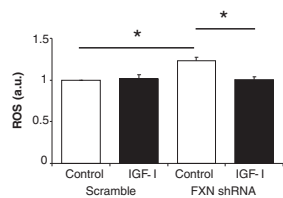**D**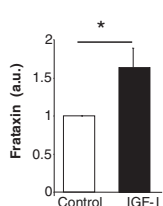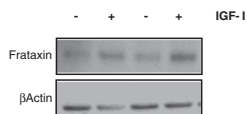**E**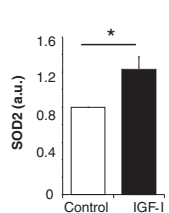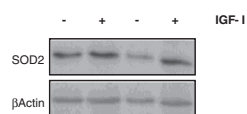**F**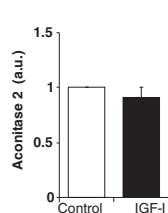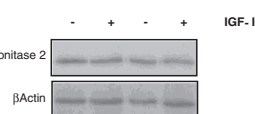

Supplement: MOESM1 [file 9643836]
